# Supplementary material for: Structural features embedded in G protein-coupled receptor co-crystal structures are key to their success in virtual screening
Source: PubMed Central journal article supplement (PMC5381884; doi:10.1371/journal.pone.0174719), 2017-04-05

**S5 Fig. Dendrogram of the ligand chemotypes for B2AR.** Known a) agonists and b) inhibitors. The number of ligands within each branch is noted. Clusters used in VS are circled and named, and the co-crystal X-ray ligand's position is identified. The asterisk denotes the location of the chemotype cluster center for its respective chemotype cluster, no cluster center is provided for the cluster 'other'.

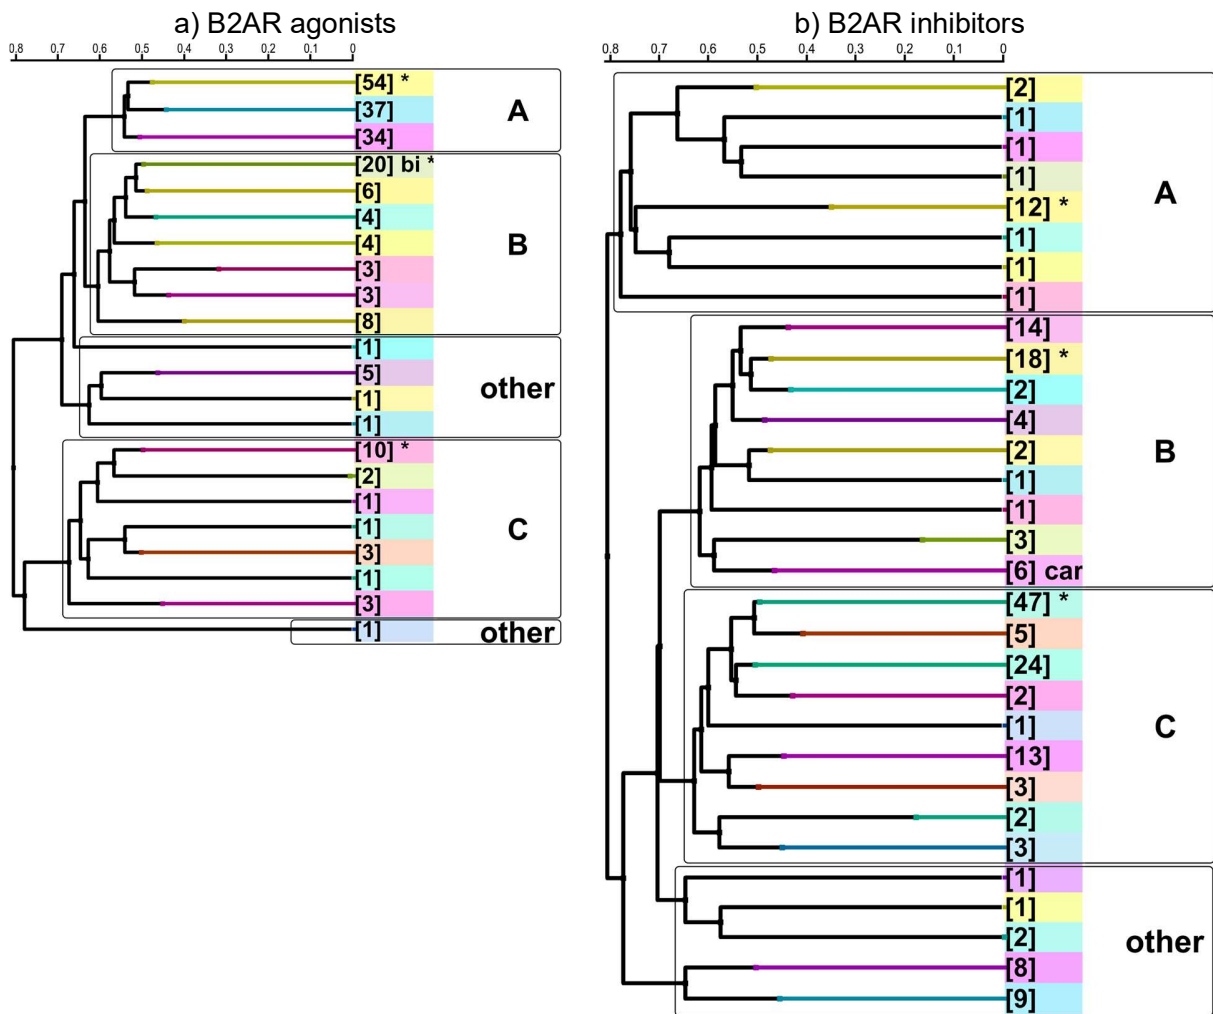

Supplement: pone.0174719.s005.pdf [file pone.0174719.s005.pdf]
