# Supplementary material for: Structural features embedded in G protein-coupled receptor co-crystal structures are key to their success in virtual screening
Source: PubMed Central journal article supplement (PMC5381884; doi:10.1371/journal.pone.0174719), 2017-04-05

**S7 Fig. Enrichment factors of AA2AR known agonist chemotypes for CGS-bound AA2AR binding pockets (4UG2-A, 4UG2-B, 4UHR). Enrichment factors at EF2, EF5 and EF10 using the 2D racemic ligand library.**

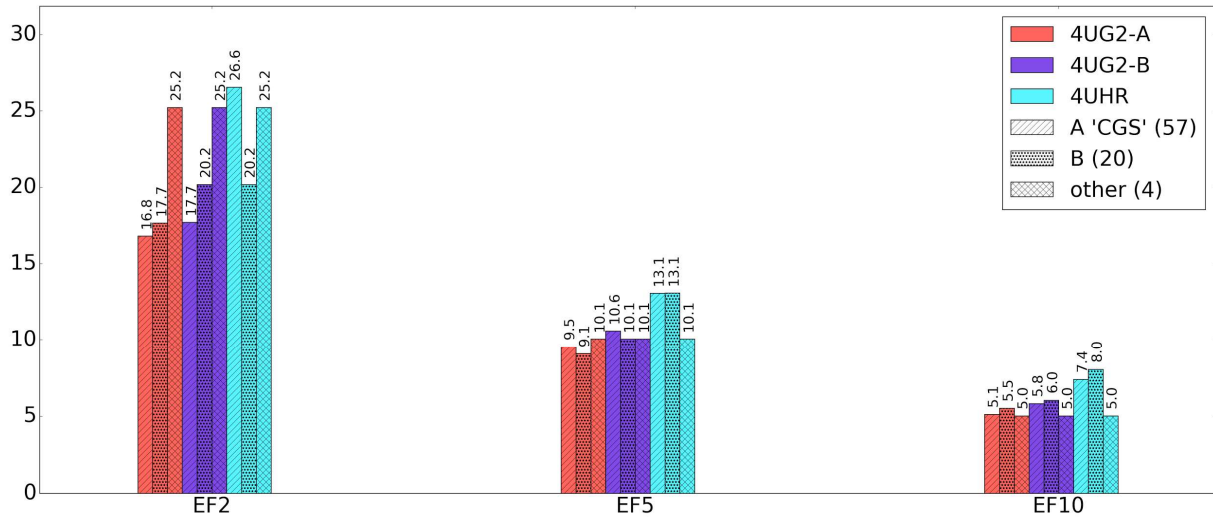

Supplement: pone.0174719.s007.pdf [file pone.0174719.s007.pdf]
