# Supplementary material for: Structural features embedded in G protein-coupled receptor co-crystal structures are key to their success in virtual screening
Source: PubMed Central journal article supplement (PMC5381884; doi:10.1371/journal.pone.0174719), 2017-04-05

**S8 Fig. Cognate docking of the ZM ligand on all AA2AR ZM-bound binding pockets (3EML, 3PWH, 3VG9, 3VGA and 4EIY).** All complexes were superimposed and only one representative receptor is displayed in grey, with TM6 and TM7 omitted for clarity. Carbon atoms of the ligands are colored as follows: 3EML (red), 3PWH (purple), 3VG9 (cyan), 3VGA (green), 4EIY (yellow).

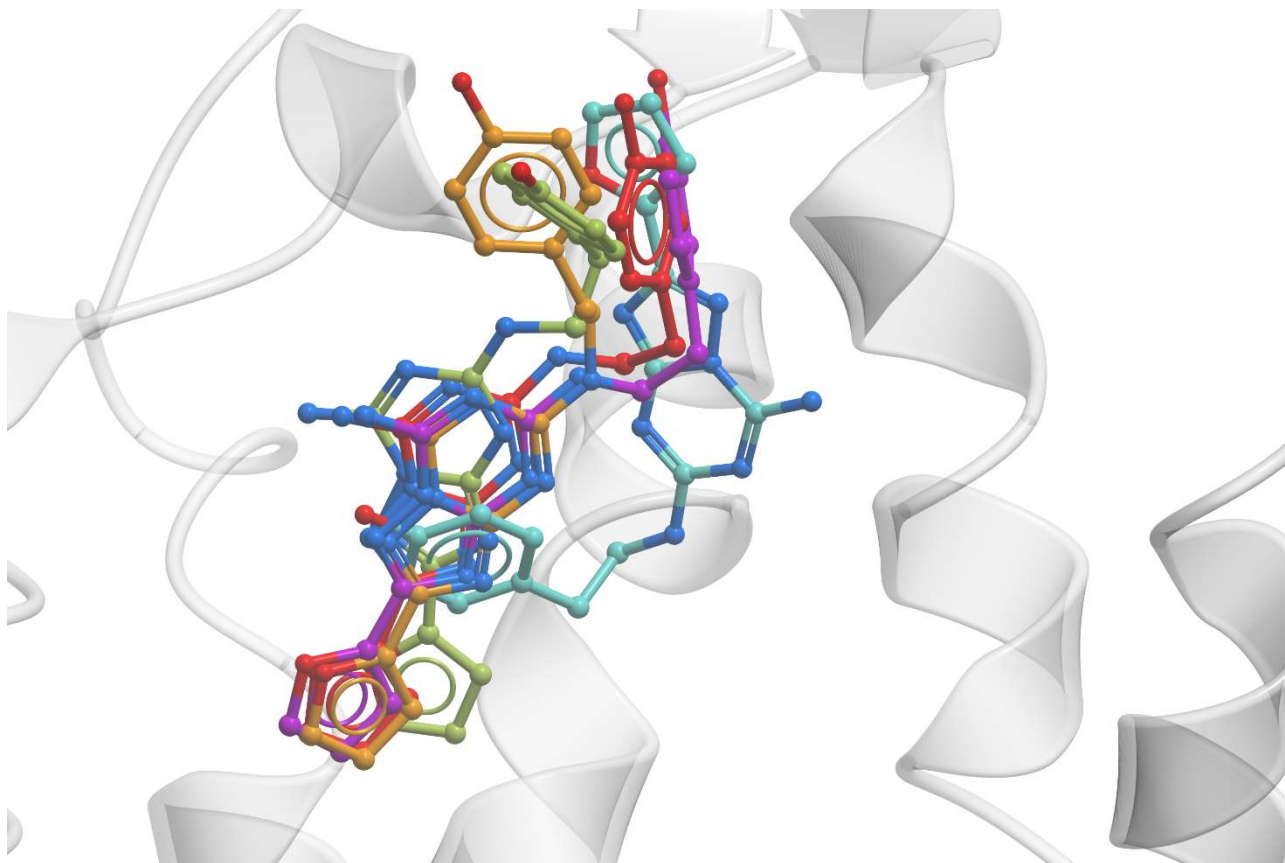

Supplement: pone.0174719.s008.pdf [file pone.0174719.s008.pdf]
