# Supplementary material for: Structural features embedded in G protein-coupled receptor co-crystal structures are key to their success in virtual screening
Source: PubMed Central journal article supplement (PMC5381884; doi:10.1371/journal.pone.0174719), 2017-04-05

**S9 Fig. Enrichment factors of AA2AR known inhibitor chemotypes for ZM-bound AA2AR binding pockets (3EML, 3PWH, 3VG9, 3VGA, 4EIY). Enrichment factors at EF2, EF5 and EF10.**

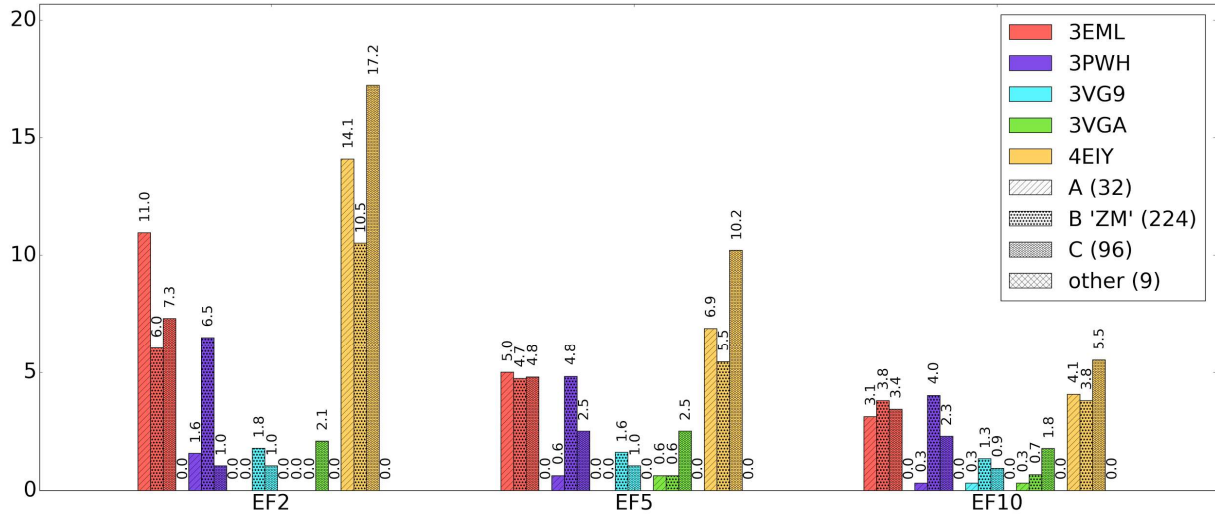

Supplement: pone.0174719.s009.pdf [file pone.0174719.s009.pdf]
