# Supplementary material for: Structural features embedded in G protein-coupled receptor co-crystal structures are key to their success in virtual screening
Source: PubMed Central journal article supplement (PMC5381884; doi:10.1371/journal.pone.0174719), 2017-04-05

**S10 Fig. Enrichment factors of B1AR known agonist chemotypes for DOB-bound B1AR binding pockets (2Y00-A, 2Y00-B, 2Y01-A, 2Y01-B). Enrichment factors at EF2, EF5 and EF10.**

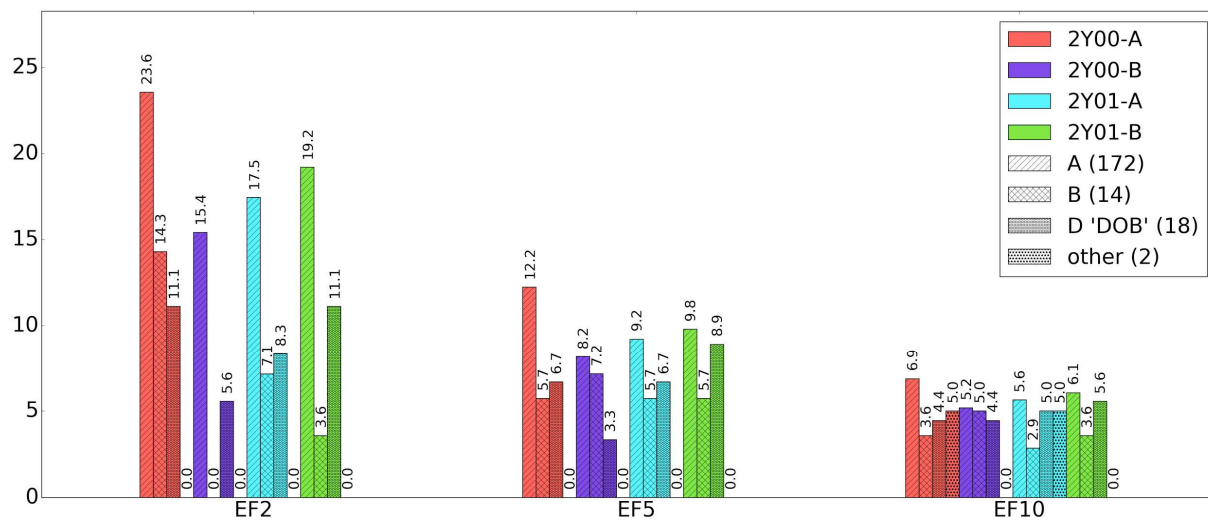

Supplement: pone.0174719.s010.pdf [file pone.0174719.s010.pdf]
