# Supplementary material for: Structural features embedded in G protein-coupled receptor co-crystal structures are key to their success in virtual screening
Source: PubMed Central journal article supplement (PMC5381884; doi:10.1371/journal.pone.0174719), 2017-04-05

**S13 Fig. Enrichment factors of B2AR known inhibitor chemotypes for CAR-bound B2AR binding pockets (2RH1, 4GBR). Enrichment factors at EF2, EF5 and EF10.**

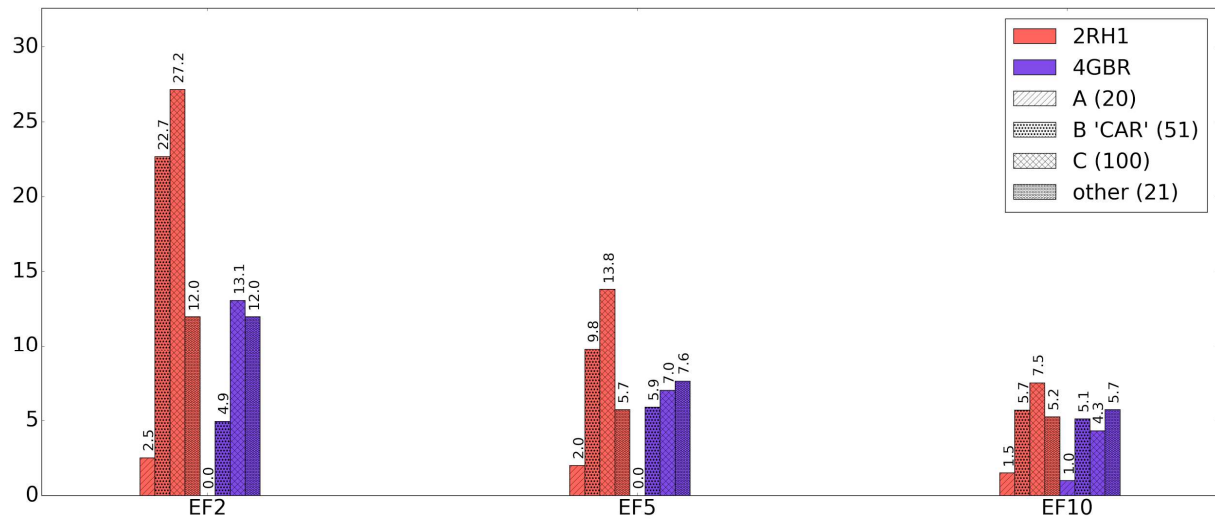

Supplement: pone.0174719.s013.pdf [file pone.0174719.s013.pdf]
