# Supplementary material for: Structural features embedded in G protein-coupled receptor co-crystal structures are key to their success in virtual screening
Source: PubMed Central journal article supplement (PMC5381884; doi:10.1371/journal.pone.0174719), 2017-04-05

**S15 Fig. RSCC and B-factor plots for AA2AR ZM-bound binding pockets.** Assessment of local model quality for: a) 3EML, b) 3PWH, c) 3VG9, d) 3VGA and e) 4EIY. Real-space correlation coefficient (green) and B-factor values (red) are shown for all residues of the binding pocket and the bound ligand ZM. A green dotted line cutoff value of 0.8 highlights low RSCC values.

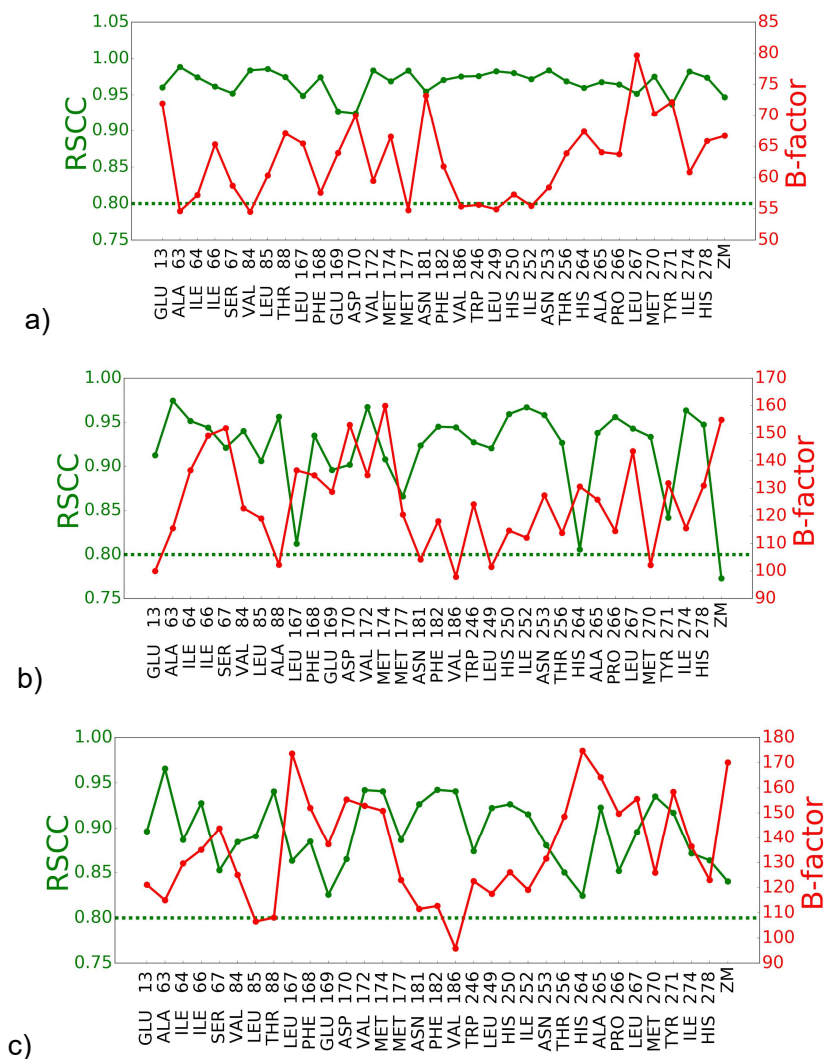

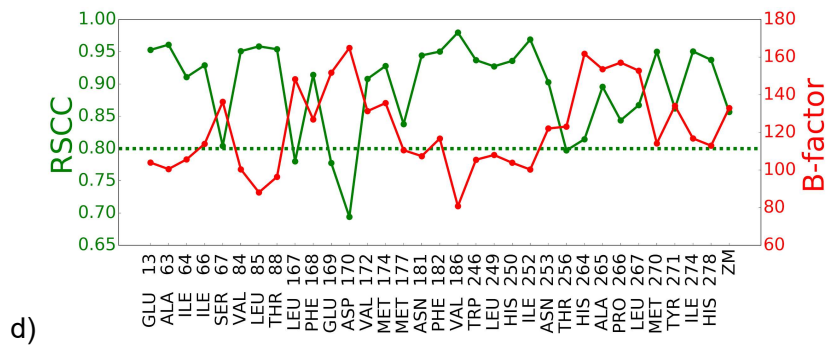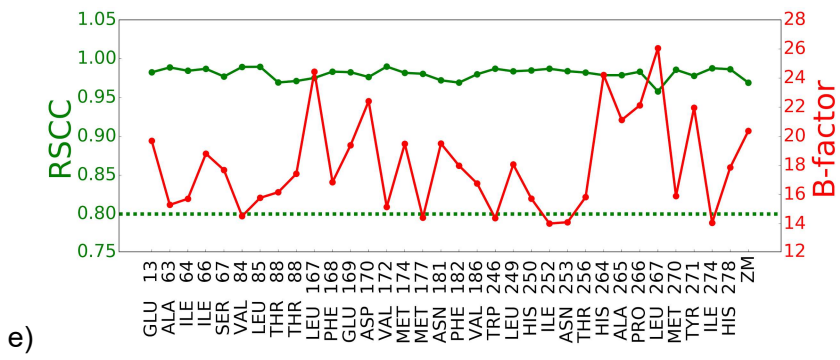

Supplement: pone.0174719.s015.pdf [file pone.0174719.s015.pdf]
