# Supplementary material for: Structural features embedded in G protein-coupled receptor co-crystal structures are key to their success in virtual screening
Source: PubMed Central journal article supplement (PMC5381884; doi:10.1371/journal.pone.0174719), 2017-04-05

**S20 Fig. RSCC and B-factor plots for DOR NAL-bound binding pockets.** Assessment of local model quality for: a) 4EJ4 and b) 4N6H. Real-space correlation coefficient (green) and B-factor values (red) are shown for all residues of the binding pocket and the bound ligand NAL. A green dotted line cutoff value of 0.8 highlights low RSCC values.

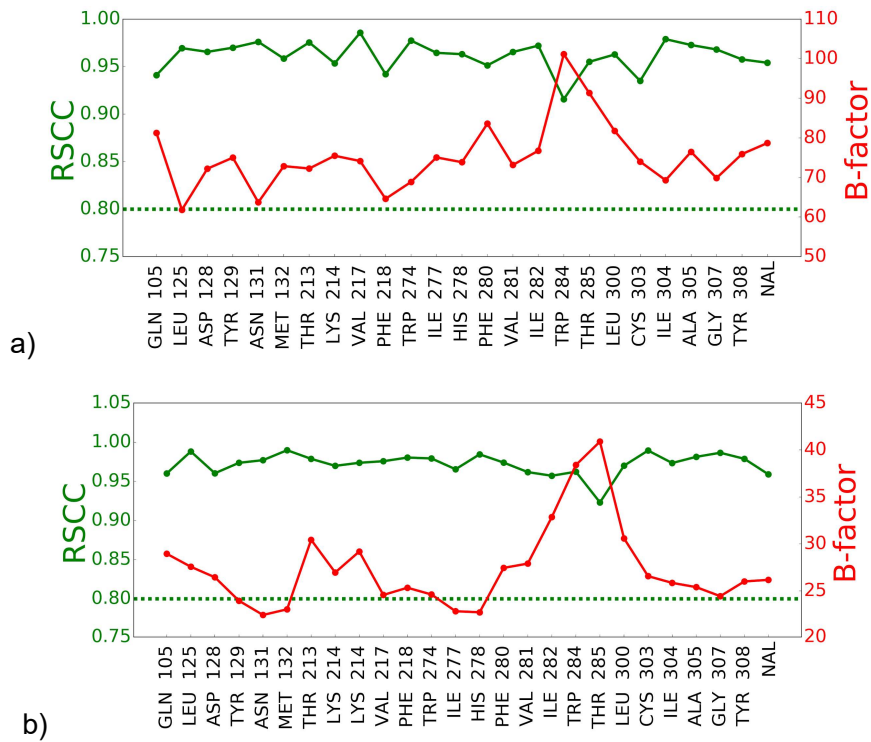

Supplement: pone.0174719.s020.pdf [file pone.0174719.s020.pdf]
