# Supplementary material for: Structural features embedded in G protein-coupled receptor co-crystal structures are key to their success in virtual screening
Source: PubMed Central journal article supplement (PMC5381884; doi:10.1371/journal.pone.0174719), 2017-04-05
Supplement: pone.0174719.s022.pdf [file pone.0174719.s022.pdf]

**S1 Table. Known ligand library and decoys for each GPCR.** Details about known ligand count, chiral center composition, as well as chemotype clusters names and counts. A chemical structure for the center of each chemotype cluster is represented, as well as each ligand from co-crystal X-ray structure.

| Library name   | Known ligand count | Chirality                                      |                                      | Chemotype main clusters |       |                                                                                      | Co-crystal ligand                                                                               | Decoys # |
|----------------|--------------------|------------------------------------------------|--------------------------------------|-------------------------|-------|--------------------------------------------------------------------------------------|-------------------------------------------------------------------------------------------------|----------|
|                |                    | % of compounds with at least one chiral center | avg. # of chiral center per compound | Name                    | Count | Center                                                                               |                                                                                                 |          |
| AA2AR agonists | 81                 | 100.0                                          | 4.07                                 | A<br>'CGS'              | 57    | 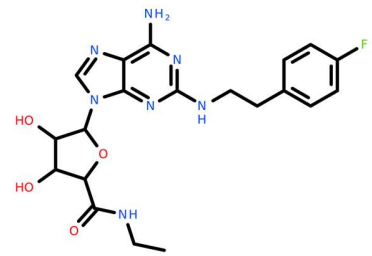 | <p>CGS</p>  | 3198     |

|                  |     |       |      |        |     |                                                                                       |                                                                                           |       |
|------------------|-----|-------|------|--------|-----|---------------------------------------------------------------------------------------|-------------------------------------------------------------------------------------------|-------|
|                  |     |       |      | B      | 20  | 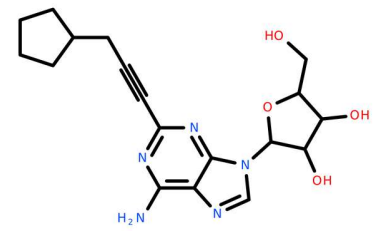   |                                                                                           |       |
| AA2AR inhibitors | 361 | 14.40 | 0.26 | A      | 32  |    | ZM<br> | 14078 |
|                  |     |       |      | B 'ZM' | 224 |   |                                                                                           |       |
|                  |     |       |      | C      | 96  |  |                                                                                           |       |

|                 |     |       |      |            |     |                                                                                      |                                                                                                 |      |
|-----------------|-----|-------|------|------------|-----|--------------------------------------------------------------------------------------|-------------------------------------------------------------------------------------------------|------|
| B1AR agonists   | 206 | 81.07 | 1.33 | A          | 172 | 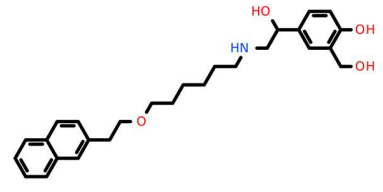  | <p>DOB</p>   | 8151 |
|                 |     |       |      | B          | 14  |   |                                                                                                 |      |
|                 |     |       |      | C<br>'DOB' | 18  |   |                                                                                                 |      |
| B1AR inhibitors | 208 | 90.38 | 1.23 | A          |     |  | <p>CYP</p>  | 8229 |

|               |     |       |      |         |     |                                                                                       |                                                                                     |      |
|---------------|-----|-------|------|---------|-----|---------------------------------------------------------------------------------------|-------------------------------------------------------------------------------------|------|
|               |     |       |      | B 'CYP' |     | 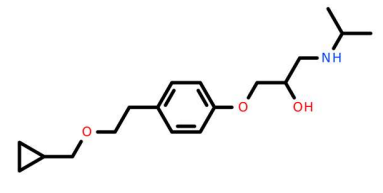   |                                                                                     |      |
|               |     |       |      | C       |     |    |                                                                                     |      |
| B2AR agonists | 204 | 81.28 | 1.35 | A       | 125 |    |  | 8034 |
|               |     |       |      | B 'BI'  | 48  |   |                                                                                     |      |
|               |     |       |      | C       | 21  |  |                                                                                     |      |

|                 |     |       |      |         |     |                                                                                      |                                                                                                |      |
|-----------------|-----|-------|------|---------|-----|--------------------------------------------------------------------------------------|------------------------------------------------------------------------------------------------|------|
| B2AR inhibitors | 192 | 90.63 | 1.22 | A       | 20  | 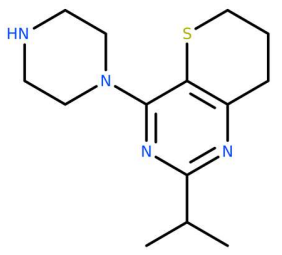  | <p>CAR</p>  | 7955 |
|                 |     |       |      | B 'CAR' | 51  |   |                                                                                                |      |
|                 |     |       |      | C       | 100 |   |                                                                                                |      |
| DOR agonists    | 357 | 45.35 | 1.52 | A       | 165 |  |                                                                                                | -    |

|                |    |       |      |         |    |      |     |  |
|----------------|----|-------|------|---------|----|------|-----|--|
|                |    |       |      | B       | 39 |      |     |  |
|                |    |       |      | C       | 42 |      |     |  |
|                |    |       |      | D       | 78 |      |     |  |
| DOR inhibitors | 15 | 93.33 | 4.13 | A 'NAL' | 8  | <br> | 624 |  |

|  |  |  |  |   |   |                                                                                     |  |  |
|--|--|--|--|---|---|-------------------------------------------------------------------------------------|--|--|
|  |  |  |  | B | 5 | 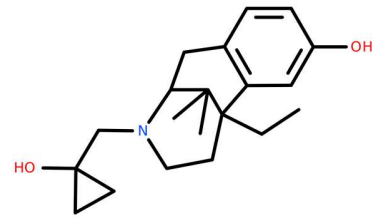 |  |  |
|--|--|--|--|---|---|-------------------------------------------------------------------------------------|--|--|
