# Supplementary material for: Structural features embedded in G protein-coupled receptor co-crystal structures are key to their success in virtual screening
Source: PubMed Central journal article supplement (PMC5381884; doi:10.1371/journal.pone.0174719), 2017-04-05
Supplement: pone.0174719.s023.pdf [file pone.0174719.s023.pdf]

**S2 Table. Statistical significance of VS performance between AA2AR CGS-bound binding pockets.** One-way ANOVA was performed on mean NSQ\_AUC  $\pm$  S.E.M. for each of the docking experiments, followed by a Tukey multiple comparison test for a) AA2AR agonists vs. decoys (Fig 1b) and b) AA2AR agonists vs. AA2AR inhibitors (Fig 1c). Binding pocket performance is tested with P value noted as follows. \*:  $P \leq 0.05$ , \*\*:  $P \leq 0.01$ , \*\*\*:  $P \leq 0.001$ , \*\*\*\*:  $P \leq 0.0001$ , ns: not significantly different. Black asterisks signify the row structure is significantly better than the column structure, and vice-versa for red asterisks.

| a) AA2AR agonists vs. decoys |  | 4UG2-A | 4UG2-B | 4UHR |
|------------------------------|--|--------|--------|------|
| 4UG2-A                       |  |        | ns     | ***  |
| 4UG2-B                       |  |        |        | **   |
| 4UHR                         |  |        |        |      |

  

| b) AA2AR agonists vs. AA2AR inhibitors |  | 4UG2-A | 4UG2-B | 4UHR |
|----------------------------------------|--|--------|--------|------|
| 4UG2-A                                 |  |        | *      | ***  |
| 4UG2-B                                 |  |        |        | **   |
| 4UHR                                   |  |        |        |      |
