# Supplementary material for: Structural features embedded in G protein-coupled receptor co-crystal structures are key to their success in virtual screening
Source: PubMed Central journal article supplement (PMC5381884; doi:10.1371/journal.pone.0174719), 2017-04-05
Supplement: pone.0174719.s024.pdf [file pone.0174719.s024.pdf]

**S3 Table. Statistical significance of VS performance between AA2AR ZM-bound binding pockets.** One-way ANOVA was performed on mean NSQ\_AUC ± S.E.M. for each of the docking experiments, followed by a Tukey multiple comparison test for a) AA2AR inhibitors vs. decoys (Fig 3b) and b) AA2AR inhibitors vs. AA2AR agonists (Fig 3c). Binding pocket performance is tested with P value noted as follows. \*: P ≤ 0.05, \*\*: P ≤ 0.01, \*\*\*: P ≤ 0.001, \*\*\*\*: P ≤ 0.0001, ns: not significantly different. Black asterisks signify the row structure is significantly better than the column structure, and vice-versa for red asterisks.

| a) AA2AR inhibitors vs. decoys |      |      |      |      |      | b) AA2AR inhibitors vs. agonists |      |      |      |      |      |
|--------------------------------|------|------|------|------|------|----------------------------------|------|------|------|------|------|
|                                | 3EML | 3PWH | 3VG9 | 3VGA | 4EIY |                                  | 3EML | 3PWH | 3VG9 | 3VGA | 4EIY |
| 3EML                           |      | **** | **** | **** | ***  | 3EML                             |      | **** | ns   | ns   | ns   |
| 3PWH                           |      |      | **** | **** | **** | 3PWH                             |      |      | **** | **** | **** |
| 3VG9                           |      |      |      | **** | **** | 3VG9                             |      |      |      | ns   | ns   |
| 3VGA                           |      |      |      |      | **** | 3VGA                             |      |      |      |      | ns   |
| 4EIY                           |      |      |      |      |      | 4EIY                             |      |      |      |      |      |
