# Supplementary material for: Structural features embedded in G protein-coupled receptor co-crystal structures are key to their success in virtual screening
Source: PubMed Central journal article supplement (PMC5381884; doi:10.1371/journal.pone.0174719), 2017-04-05
Supplement: pone.0174719.s025.pdf [file pone.0174719.s025.pdf]

**S4 Table. Statistical significance of VS performance between B1AR DOB-bound binding pockets.** One-way ANOVA was performed on mean NSQ\_AUC  $\pm$  S.E.M. for each of the docking experiments, followed by a Tukey multiple comparison test for a) B1AR agonists vs. decoys (Fig 4b) and b) B1AR agonists vs. B1AR inhibitors (Fig 4c). Binding pocket performance is tested with P value noted as follows. \*:  $P \leq 0.05$ , \*\*:  $P \leq 0.01$ , \*\*\*:  $P \leq 0.001$ , \*\*\*\*:  $P \leq 0.0001$ , ns: not significantly different. Black asterisks signify the row structure is significantly better than the column structure, and vice-versa for red asterisks.

|        |  | a) B1AR agonists vs. decoys |        |        |        |        |  | b) B1AR agonists vs. B1AR inhibitors |        |        |        |
|--------|--|-----------------------------|--------|--------|--------|--------|--|--------------------------------------|--------|--------|--------|
|        |  | 2Y00-A                      | 2Y00-B | 2Y01-A | 2Y01-B |        |  | 2Y00-A                               | 2Y00-B | 2Y01-A | 2Y01-B |
| 2Y00-A |  |                             | ****   | ****   | ***    | 2Y00-A |  | *                                    | **     | *      |        |
| 2Y00-B |  |                             |        | ns     | ns     | 2Y00-B |  |                                      | ns     | ns     |        |
| 2Y01-A |  |                             |        |        | ns     | 2Y01-A |  |                                      |        | ns     |        |
| 2Y01-B |  |                             |        |        |        | 2Y01-B |  |                                      |        |        |        |
