# Supplementary material for: Structural features embedded in G protein-coupled receptor co-crystal structures are key to their success in virtual screening
Source: PubMed Central journal article supplement (PMC5381884; doi:10.1371/journal.pone.0174719), 2017-04-05
Supplement: pone.0174719.s026.pdf [file pone.0174719.s026.pdf]

**S5 Table. Statistical significance of VS performance between B1AR CYP-bound binding pockets.** One-way ANOVA was performed on mean NSQ\_AUC  $\pm$  S.E.M. for each of the docking experiments, followed by a Tukey multiple comparison test for a) B1AR inhibitors vs. decoys (Fig 5b) and b) B1AR inhibitors vs. B1AR agonists (Fig 5c). Binding pocket performance is tested with P value noted as follows. \*:  $P \leq 0.05$ , \*\*:  $P \leq 0.01$ , \*\*\*:  $P \leq 0.001$ , \*\*\*\*:  $P \leq 0.0001$ , ns: not significantly different. Black asterisks signify the row structure is significantly better than the column structure, and vice-versa for red asterisks.

| a) B1AR inhibitors vs. decoys |      |      |      |      | b) B1AR inhibitors vs. B1AR agonists |      |      |      |      |
|-------------------------------|------|------|------|------|--------------------------------------|------|------|------|------|
|                               | 2VT4 | 2YCX | 2YCY | 4BVN |                                      | 2VT4 | 2YCX | 2YCY | 4BVN |
| 2VT4                          |      | **   | ***  | *    | 2VT4                                 |      | **** | ***  | ***  |
| 2YCX                          |      |      | ns   | ns   | 2YCX                                 |      |      | ns   | *    |
| 2YCY                          |      |      |      | *    | 2YCY                                 |      |      |      | ns   |
| 4BVN                          |      |      |      |      | 4BVN                                 |      |      |      |      |
