# Supplementary material for: Structural features embedded in G protein-coupled receptor co-crystal structures are key to their success in virtual screening
Source: PubMed Central journal article supplement (PMC5381884; doi:10.1371/journal.pone.0174719), 2017-04-05
Supplement: pone.0174719.s027.pdf [file pone.0174719.s027.pdf]

**S6 Table. Statistical significance of VS performance between B2AR BI-bound binding pockets.** One-way ANOVA was performed on mean NSQ\_AUC  $\pm$  S.E.M. for each of the docking experiments, followed by a Tukey multiple comparison test for a) B2AR agonists vs. decoys (Fig 6b) and b) B2AR agonists vs. B2AR inhibitors (Fig 6c). Binding pocket performance is tested with P value noted as follows. \*:  $P \leq 0.05$ , \*\*:  $P \leq 0.01$ , \*\*\*:  $P \leq 0.001$ , \*\*\*\*:  $P \leq 0.0001$ , ns: not significantly different. Black asterisks signify the row structure is significantly better than the column structure, and vice-versa for red asterisks.

| a) B2AR agonists vs. decoys |      | b) B2AR agonists vs. B2AR inhibitors |      |      |      |      |      |
|-----------------------------|------|--------------------------------------|------|------|------|------|------|
|                             | 3P0G | 3SN6                                 | 4LDE |      | 3P0G | 3SN6 | 4LDE |
| 3P0G                        |      | ***                                  | **** | 3P0G |      | ns   | **** |
| 3SN6                        |      |                                      | ***  | 3SN6 |      |      | **** |
| 4LDE                        |      |                                      |      | 4LDE |      |      |      |
