# Supplementary material for: Structural features embedded in G protein-coupled receptor co-crystal structures are key to their success in virtual screening
Source: PubMed Central journal article supplement (PMC5381884; doi:10.1371/journal.pone.0174719), 2017-04-05
Supplement: pone.0174719.s028.pdf [file pone.0174719.s028.pdf]

**S7 Table. Statistical significance of VS performance between B2AR CAR-bound binding pockets.** An unpaired t test with Welch's correction was carried out on mean NSQ\_AUC  $\pm$  S.E.M. for each of the docking experiments for a) B2AR inhibitors vs. decoys (Fig 7b) and b) B2AR inhibitors vs. B2AR agonists (Fig 7c). Binding pocket performance is tested with P value noted as follows. \*:  $P \leq 0.05$ , \*\*:  $P \leq 0.01$ , \*\*\*:  $P \leq 0.001$ , \*\*\*\*:  $P \leq 0.0001$ , ns: not significantly different. Black asterisks signify the row structure is significantly better than the column structure, and vice-versa for red asterisks.

| a) B2AR inhibitors vs. decoys |      | b) B2AR inhibitors vs. B2AR agonists |  |      |      |
|-------------------------------|------|--------------------------------------|--|------|------|
|                               | 2RH1 | 4GBR                                 |  | 2RH1 | 4GBR |
| 2RH1                          |      | ***                                  |  |      | **   |
| 4GBR                          |      |                                      |  |      |      |
