# Supplementary material for: Structural features embedded in G protein-coupled receptor co-crystal structures are key to their success in virtual screening
Source: PubMed Central journal article supplement (PMC5381884; doi:10.1371/journal.pone.0174719), 2017-04-05
Supplement: pone.0174719.s029.pdf [file pone.0174719.s029.pdf]

**S8 Table. Statistical significance of VS performance between DOR NAL-bound binding pockets.** An unpaired t test with Welch's correction was carried out on mean NSQ\_AUC  $\pm$  S.E.M. for each of the docking experiments for a) DOR inhibitors vs. decoys (Fig 8b) and b) DOR inhibitors vs. DOR agonists (Fig 8c). Binding pocket performance is tested with P value noted as follows. \*:  $P \leq 0.05$ , \*\*:  $P \leq 0.01$ , \*\*\*:  $P \leq 0.001$ , \*\*\*\*:  $P \leq 0.0001$ , ns: not significantly different. Black asterisks signify the row structure is significantly better than the column structure, and vice-versa for red asterisks.

| a) DOR inhibitors vs. decoys |      | b) DOR inhibitors vs. DOR agonists |      |      |      |
|------------------------------|------|------------------------------------|------|------|------|
|                              | 4EJ4 | 4N6H                               |      | 4EJ4 | 4N6H |
| 4EJ4                         |      | **                                 | 4EJ4 |      | **   |
| 4N6H                         |      |                                    | 4N6H |      |      |
